# Supplementary material for: Validation of neuromuscular blocking agent use in acute respiratory distress syndrome: a meta-analysis of randomized trials
Source: Springer Nature journal article supplement (doi:10.1186/s13054-020-2765-2), 2020-02-17

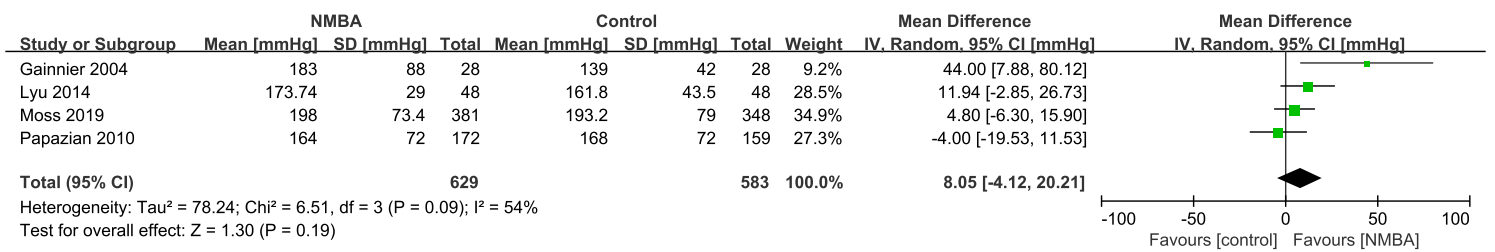

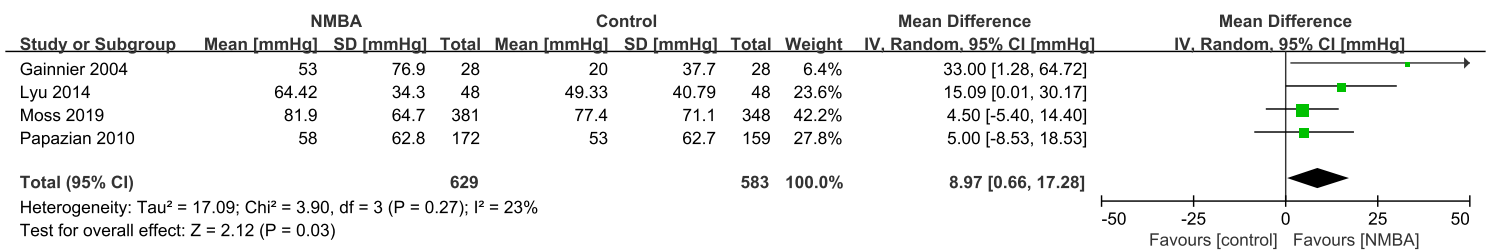

| Study or Subgroup     | NMBA        |           |            | Control     |           |            | Weight        | Mean Difference           |                           | IV, Random, 95% CI [mmHg] |
|-----------------------|-------------|-----------|------------|-------------|-----------|------------|---------------|---------------------------|---------------------------|---------------------------|
|                       | Mean [mmHg] | SD [mmHg] | Total      | Mean [mmHg] | SD [mmHg] | Total      |               | IV, Random, 95% CI [mmHg] | IV, Random, 95% CI [mmHg] |                           |
| Moss 2019             | 83.1        | 27.2      | 381        | 86.5        | 30.9      | 348        | 81.4%         | -3.40                     | [-7.64, 0.84]             |                           |
| Papazian 2010         | 93          | 38        | 172        | 96          | 44        | 159        | 18.6%         | -3.00                     | [-11.89, 5.89]            |                           |
| <b>Total (95% CI)</b> |             |           | <b>553</b> |             |           | <b>507</b> | <b>100.0%</b> | <b>-3.33</b>              | <b>[-7.15, 0.50]</b>      |                           |

Heterogeneity: Tau<sup>2</sup> = 0.00; Chi<sup>2</sup> = 0.01, df = 1 (P = 0.94); I<sup>2</sup> = 0%  
 Test for overall effect: Z = 1.70 (P = 0.09)

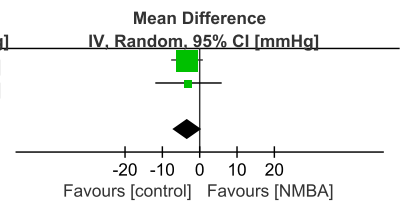

| Study or Subgroup     | NMBA        |           |            | Control     |           |            | Weight        | Mean Difference           |                           |
|-----------------------|-------------|-----------|------------|-------------|-----------|------------|---------------|---------------------------|---------------------------|
|                       | Mean [mmHg] | SD [mmHg] | Total      | Mean [mmHg] | SD [mmHg] | Total      |               | IV, Random, 95% CI [mmHg] | IV, Random, 95% CI [mmHg] |
| Moss 2019             | 1.2         | 27.16     | 381        | 4.1         | 30.19     | 348        | 55.8%         | -2.90                     | [-7.08, 1.28]             |
| Papazian 2010         | 18          | 33.5      | 172        | 11          | 38.83     | 159        | 44.2%         | 7.00                      | [-0.84, 14.84]            |
| <b>Total (95% CI)</b> |             |           | <b>553</b> |             |           | <b>507</b> | <b>100.0%</b> | <b>1.47</b>               | <b>[-8.16, 11.11]</b>     |

Heterogeneity: Tau<sup>2</sup> = 38.72; Chi<sup>2</sup> = 4.77, df = 1 (P = 0.03); I<sup>2</sup> = 79%  
 Test for overall effect: Z = 0.30 (P = 0.76)

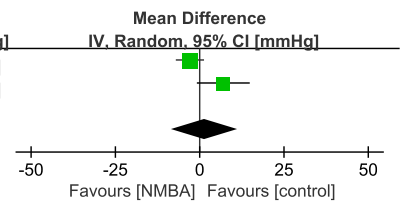

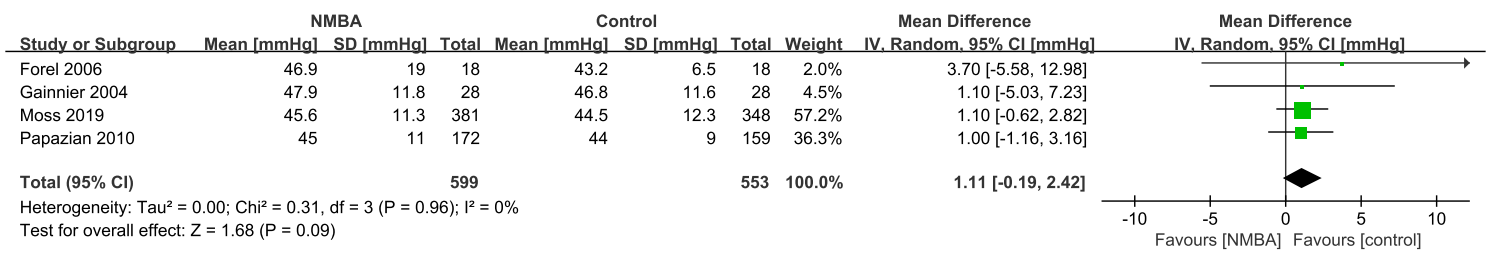

| Study or Subgroup     | NMBA        |           |            | Control     |           |            | Weight        | Mean Difference           |                           | Mean Difference |  |
|-----------------------|-------------|-----------|------------|-------------|-----------|------------|---------------|---------------------------|---------------------------|-----------------|--|
|                       | Mean [mmHg] | SD [mmHg] | Total      | Mean [mmHg] | SD [mmHg] | Total      |               | IV, Random, 95% CI [mmHg] | IV, Random, 95% CI [mmHg] |                 |  |
| Forel 2006            | -4.2        | 9.96      | 18         | -4          | 8.63      | 18         | 5.6%          | -0.20 [-6.29, 5.89]       |                           |                 |  |
| Gannier 2004          | -1          | 10.7      | 28         | -0.6        | 11.5      | 28         | 6.1%          | -0.40 [-6.22, 5.42]       |                           |                 |  |
| Moss 2019             | 1.5         | 15.5      | 381        | 0.7         | 13        | 348        | 48.3%         | 0.80 [-1.27, 2.87]        |                           |                 |  |
| Papazian 2010         | -2          | 11        | 172        | -3          | 10.1      | 159        | 40.0%         | 1.00 [-1.27, 3.27]        |                           |                 |  |
| <b>Total (95% CI)</b> |             |           | <b>599</b> |             |           | <b>553</b> | <b>100.0%</b> | <b>0.75 [-0.69, 2.19]</b> |                           |                 |  |

Heterogeneity: Tau<sup>2</sup> = 0.00; Chi<sup>2</sup> = 0.29, df = 3 (P = 0.96); I<sup>2</sup> = 0%  
 Test for overall effect: Z = 1.02 (P = 0.31)

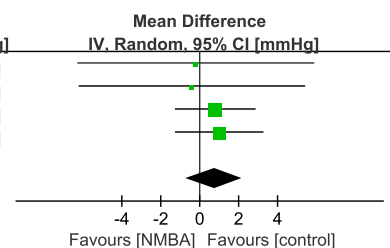

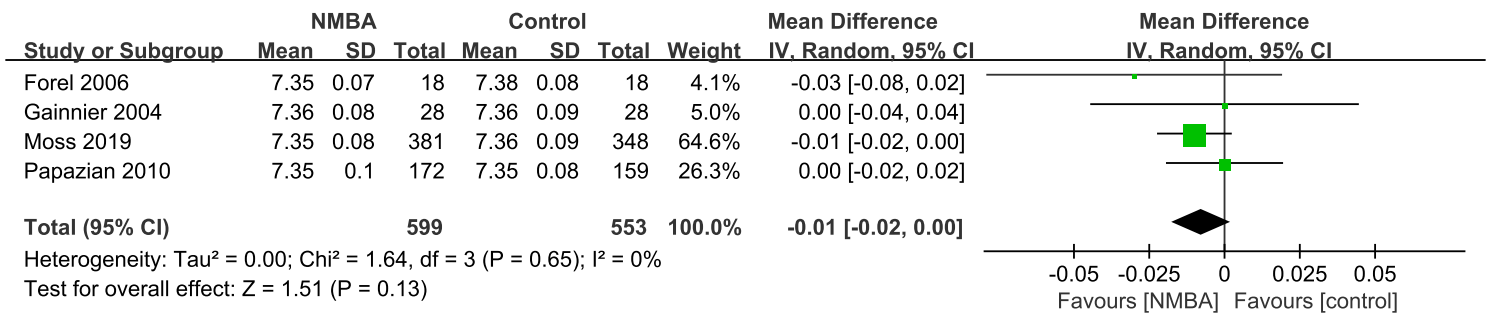

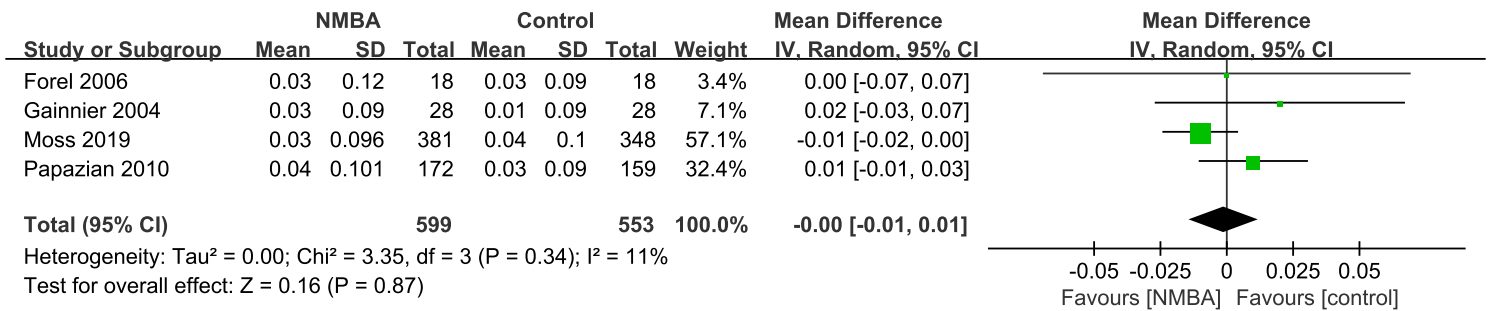



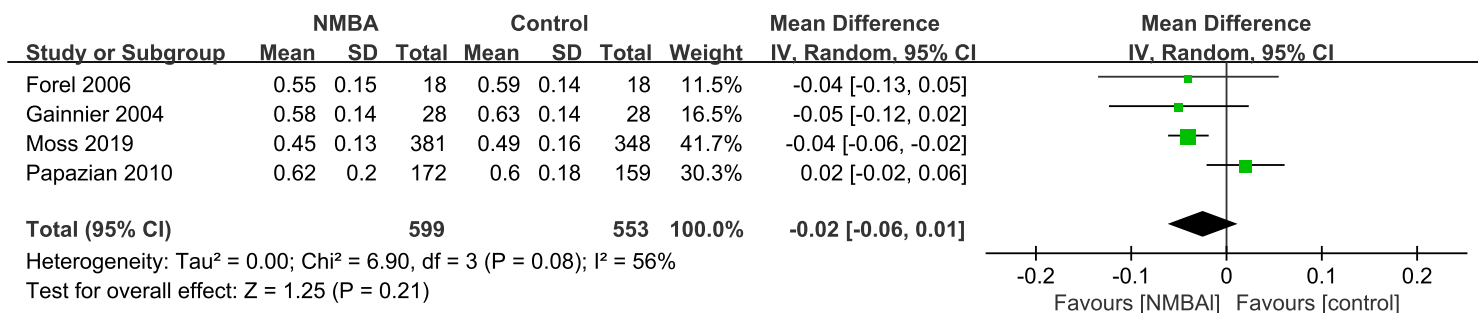

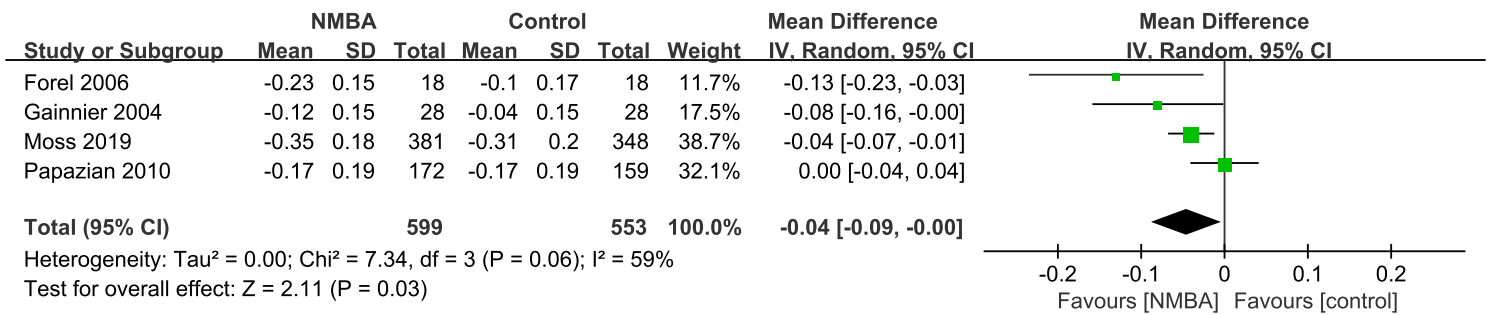

| Study or Subgroup     | NMBA         |            |            | Control      |            |            | Weight        | Mean Difference<br>IV, Random, 95% CI [cmH2O] | Mean Difference<br>IV, Random, 95% CI [cmH2O] |
|-----------------------|--------------|------------|------------|--------------|------------|------------|---------------|-----------------------------------------------|-----------------------------------------------|
|                       | Mean [cmH2O] | SD [cmH2O] | Total      | Mean [cmH2O] | SD [cmH2O] | Total      |               |                                               |                                               |
| Forel 2006            | 32.3         | 5.4        | 18         | 33.5         | 4.2        | 18         | 10.0%         | -1.20 [-4.36, 1.96]                           |                                               |
| Gainnier 2004         | 33           | 5.9        | 28         | 33.7         | 6.6        | 28         | 9.3%          | -0.70 [-3.98, 2.58]                           |                                               |
| Moss 2019             | 29.6         | 7.4        | 420        | 29.9         | 8.5        | 377        | 80.7%         | -0.30 [-1.41, 0.81]                           |                                               |
| <b>Total (95% CI)</b> |              |            | <b>466</b> |              |            | <b>423</b> | <b>100.0%</b> | <b>-0.43 [-1.43, 0.57]</b>                    |                                               |

Heterogeneity: Tau<sup>2</sup> = 0.00; Chi<sup>2</sup> = 0.31, df = 2 (P = 0.86); I<sup>2</sup> = 0%  
 Test for overall effect: Z = 0.84 (P = 0.40)

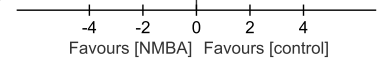

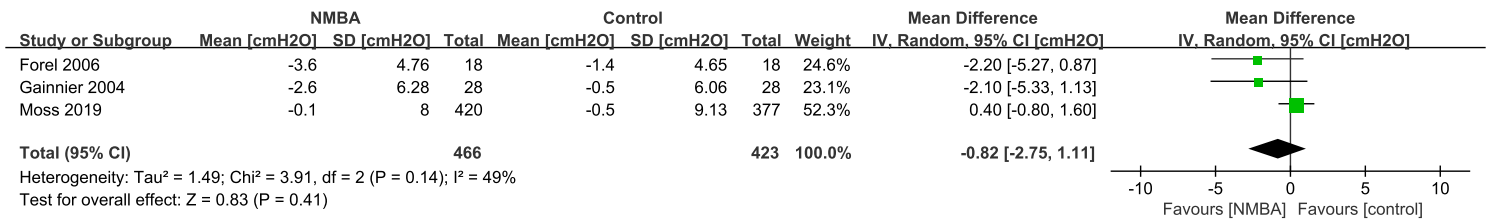

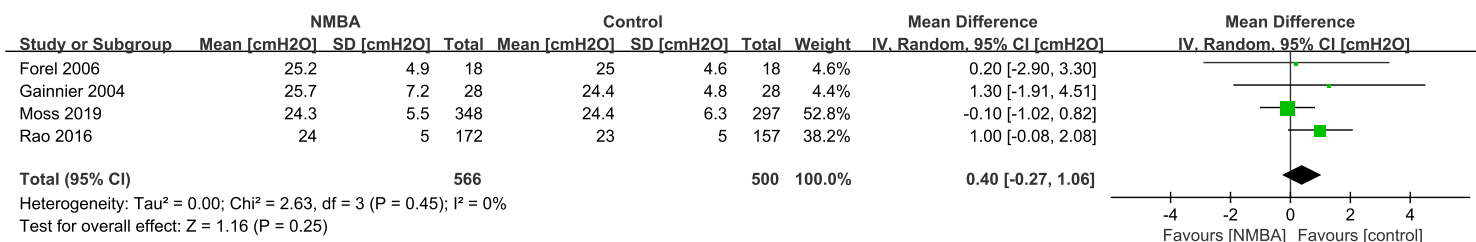

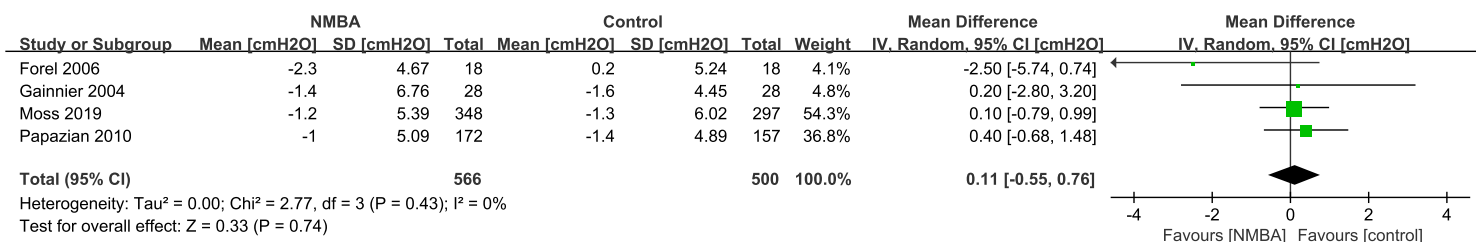

| Study or Subgroup     | NMBA             |                |            | Control          |                |            | Weight        | Mean Difference                |                                |
|-----------------------|------------------|----------------|------------|------------------|----------------|------------|---------------|--------------------------------|--------------------------------|
|                       | Mean [mL/kg PBW] | SD [mL/kg PBW] | Total      | Mean [mL/kg PBW] | SD [mL/kg PBW] | Total      |               | IV, Random, 95% CI [mL/kg PBW] | IV, Random, 95% CI [mL/kg PBW] |
| Forel 2006            | 6.6              | 0.8            | 18         | 7.1              | 0.1            | 18         | 17.2%         | -0.50                          | [-0.87, -0.13]                 |
| Gannier 2004          | 7                | 1              | 28         | 7.6              | 1.5            | 28         | 7.1%          | -0.60                          | [-1.27, 0.07]                  |
| Moss 2019             | 5.9              | 0.8            | 425        | 6                | 0.8            | 377        | 41.1%         | -0.10                          | [-0.21, 0.01]                  |
| Papazian 2010         | 6.3              | 0.8            | 171        | 6.3              | 0.8            | 159        | 34.5%         | 0.00                           | [-0.17, 0.17]                  |
| <b>Total (95% CI)</b> |                  |                | <b>642</b> |                  |                | <b>582</b> | <b>100.0%</b> | <b>-0.17</b>                   | <b>[-0.36, 0.02]</b>           |

Heterogeneity: Tau<sup>2</sup> = 0.02; Chi<sup>2</sup> = 7.86, df = 3 (P = 0.05); I<sup>2</sup> = 62%  
 Test for overall effect: Z = 1.72 (P = 0.09)

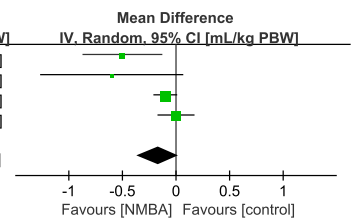

| Study or Subgroup     | NMBA             |                |            | Control          |                |            | Weight        | Mean Difference                |                                |
|-----------------------|------------------|----------------|------------|------------------|----------------|------------|---------------|--------------------------------|--------------------------------|
|                       | Mean [mL/kg PBW] | SD [mL/kg PBW] | Total      | Mean [mL/kg PBW] | SD [mL/kg PBW] | Total      |               | IV, Random, 95% CI [mL/kg PBW] | IV, Random, 95% CI [mL/kg PBW] |
| Forel 2006            | 0.1              | 0.75           | 18         | 0.1              | 0.7            | 18         | 4.6%          | 0.00 [-0.47, 0.47]             |                                |
| Gannier 2004          | -0.1             | 1.05           | 28         | 0.1              | 1.73           | 28         | 1.8%          | -0.20 [-0.95, 0.55]            |                                |
| Moss 2019             | -0.4             | 0.87           | 425        | -0.3             | 0.89           | 377        | 68.7%         | -0.10 [-0.22, 0.02]            |                                |
| Papazian 2010         | -0.25            | 1.01           | 171        | -0.18            | 0.87           | 159        | 24.9%         | -0.07 [-0.27, 0.13]            |                                |
| <b>Total (95% CI)</b> |                  |                | <b>642</b> |                  |                | <b>582</b> | <b>100.0%</b> | <b>-0.09 [-0.19, 0.01]</b>     |                                |

Heterogeneity: Tau<sup>2</sup> = 0.00; Chi<sup>2</sup> = 0.28, df = 3 (P = 0.96); I<sup>2</sup> = 0%  
 Test for overall effect: Z = 1.74 (P = 0.08)

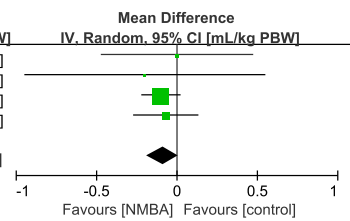



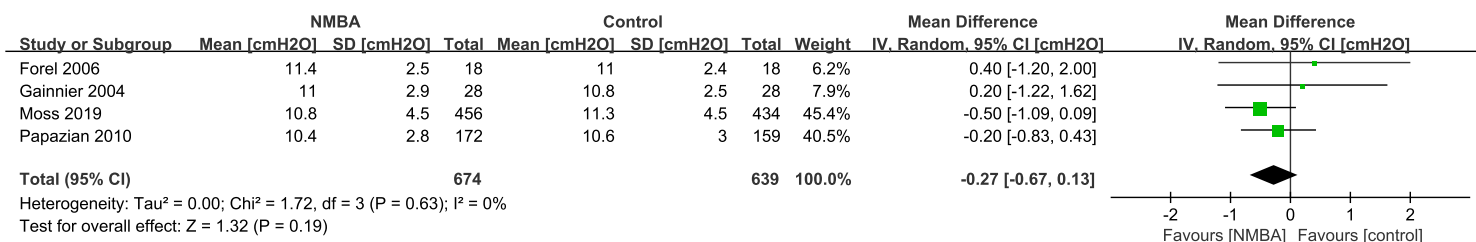

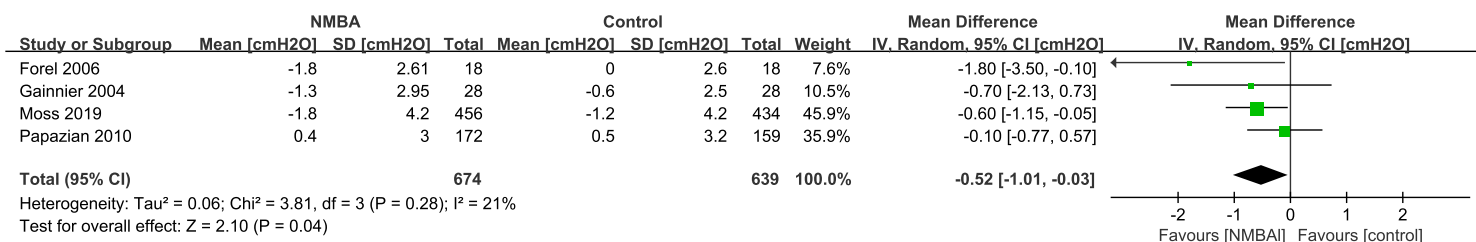

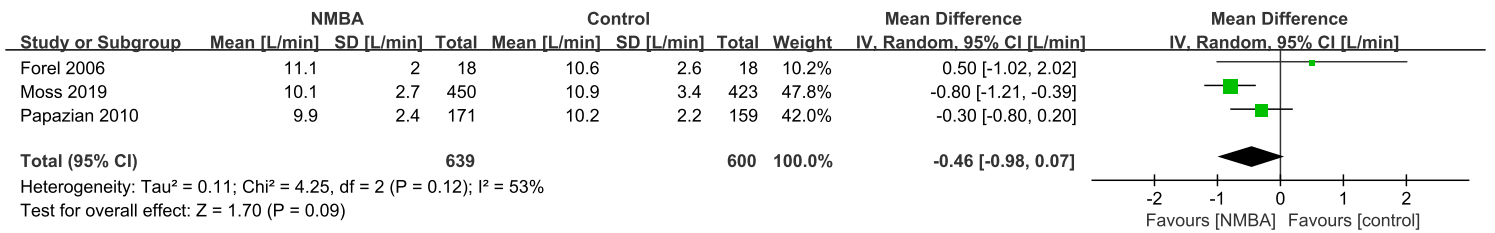

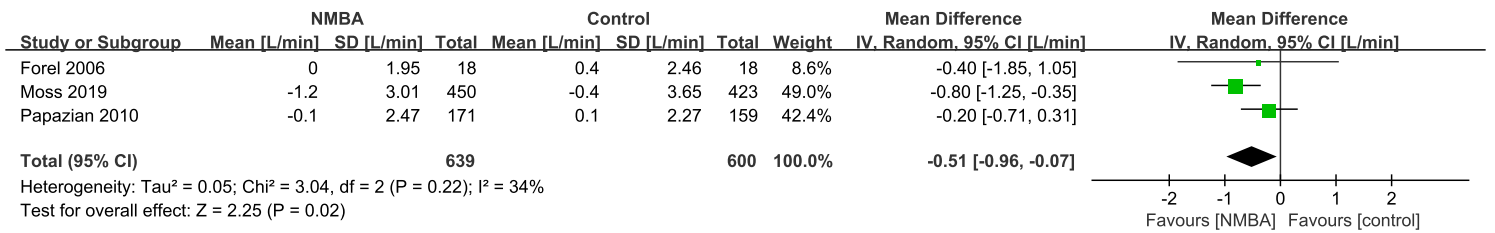

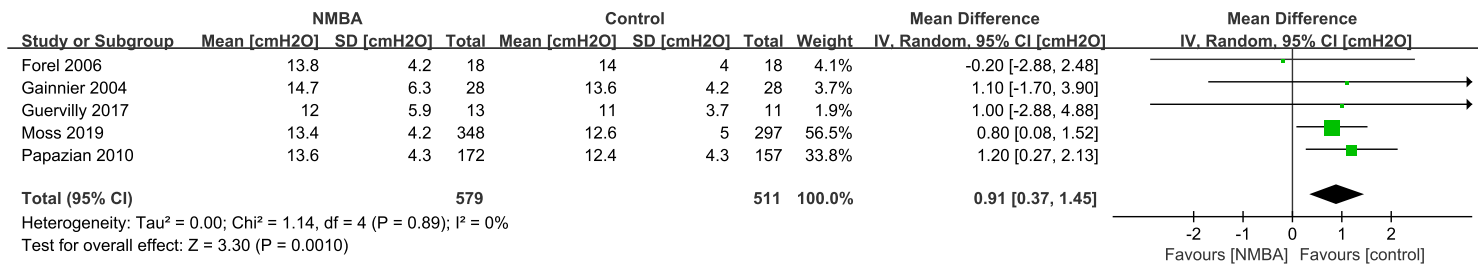

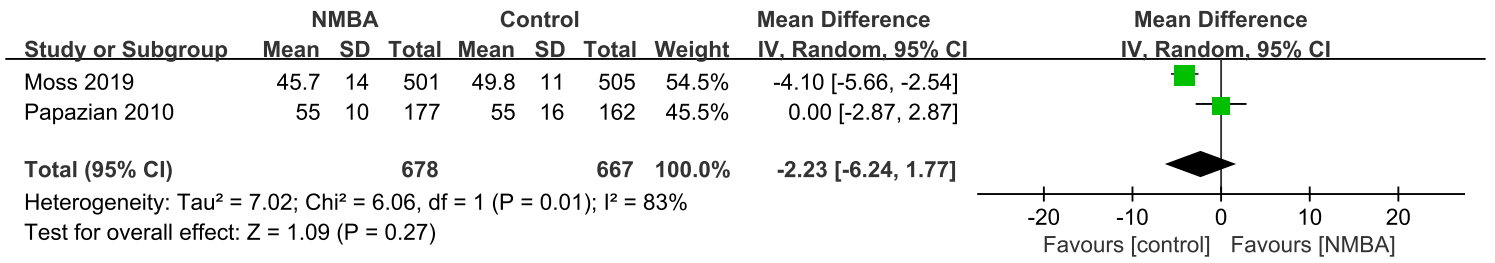

| Study or Subgroup     | NMBA              |                 |            | Control           |                 |            | Weight        | Mean Difference                 |                                 | Mean Difference |                   |
|-----------------------|-------------------|-----------------|------------|-------------------|-----------------|------------|---------------|---------------------------------|---------------------------------|-----------------|-------------------|
|                       | Mean [breath/min] | SD [breath/min] | Total      | Mean [breath/min] | SD [breath/min] | Total      |               | IV, Random, 95% CI [breath/min] | IV, Random, 95% CI [breath/min] | Favours [NMBA]  | Favours [control] |
| Gannier 2004          | 21.6              | 4.2             | 28         | 21.1              | 5.1             | 28         | 7.4%          | 0.50 [-1.95, 2.95]              |                                 |                 |                   |
| Moss 2019             | 27.1              | 6.2             | 456        | 27.7              | 6.7             | 430        | 61.2%         | -0.60 [-1.45, 0.25]             |                                 |                 |                   |
| Papazian 2010         | 25                | 6               | 171        | 25                | 5               | 159        | 31.4%         | 0.00 [-1.19, 1.19]              |                                 |                 |                   |
| <b>Total (95% CI)</b> |                   |                 | <b>655</b> |                   |                 | <b>617</b> | <b>100.0%</b> | <b>-0.33 [-1.00, 0.34]</b>      |                                 |                 |                   |

Heterogeneity: Tau<sup>2</sup> = 0.00; Chi<sup>2</sup> = 1.12, df = 2 (P = 0.57); I<sup>2</sup> = 0%  
 Test for overall effect: Z = 0.97 (P = 0.33)

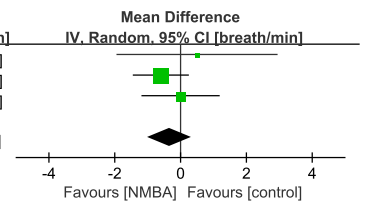

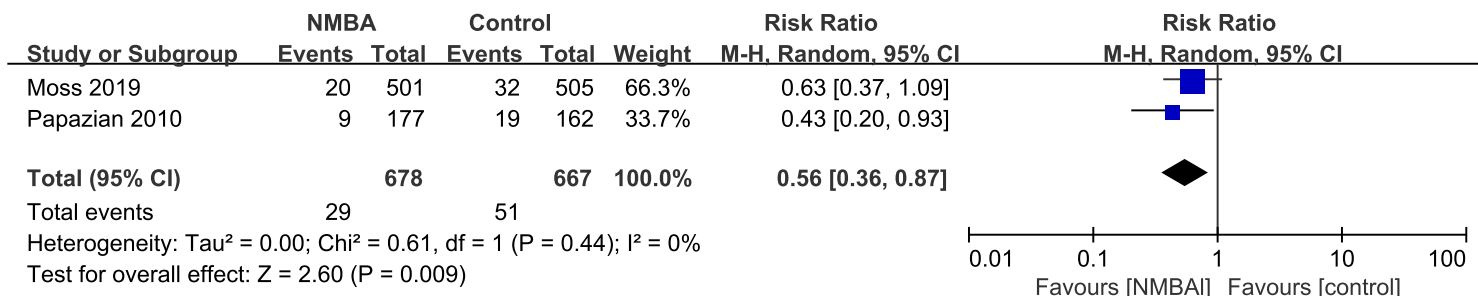



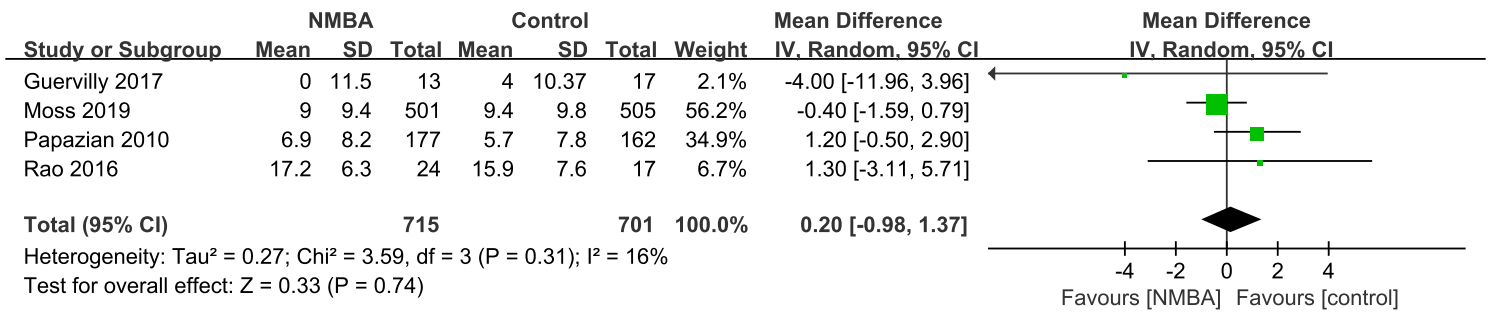

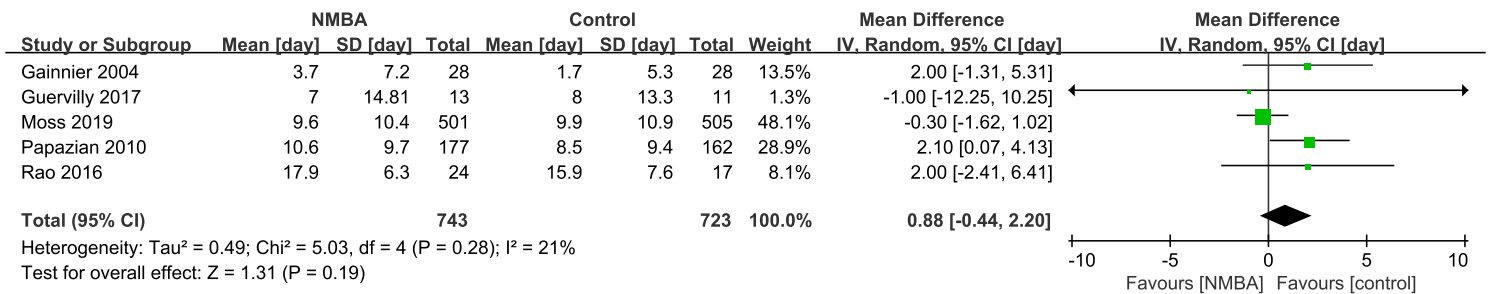

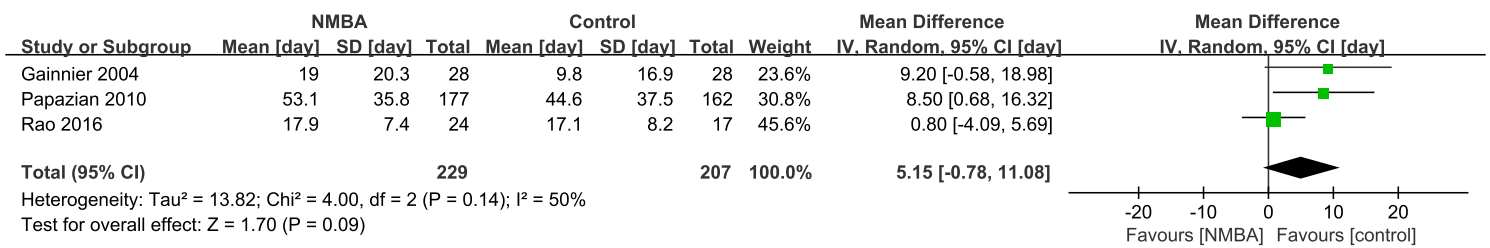

Supplement: MOESM5 [file 17715902]
