# Supplementary material for: Validation of neuromuscular blocking agent use in acute respiratory distress syndrome: a meta-analysis of randomized trials
Source: Springer Nature journal article supplement (doi:10.1186/s13054-020-2765-2), 2020-02-17

Following factors were concluded in the univariate meta-regression analysis,

- Year when the study was published,
- No. of subjects included in the study,
- Language, English or Chinese,
- ARDS diagnosis criteria, AECC or Berlin criteria,
- Estimated average PaO<sub>2</sub> to FiO<sub>2</sub> ratio of ARDS patients at enrollment
- Estimated average improvement of PaO<sub>2</sub> to FiO<sub>2</sub> ratio 24 hours after intervention.
- Quality of the study. The quality of the study was quantified as 'Yes' as 2 points, 'Unclear' as 1 point and 'No' as 0 point evaluated according to the Cochrane Collaboration's protocols. The scores were then summed up,
- Percentage of patients with ARDS from intra-pulmonary origins,
- Sedation strategies, as deep sedation (with RASS score of 6) or light sedation (with RASS score 0 to -1 or Ramsay score 2 to 4)
- Estimated average PEEP value at the initial setting

| Study           | Year | Subject | Language | Criteria | P/F ratio | P/F ratio change | Score | lung origin (%) | Sedation | PEEP (mmHg) |
|-----------------|------|---------|----------|----------|-----------|------------------|-------|-----------------|----------|-------------|
| Forel et al     | 2006 | 36      | English  | AECC     | 117       | 50               | 9     | 0.81            | Deep     | 12.1        |
| Gainnier et al  | 2004 | 56      | English  | AECC     | 124.5     | 27.5             | 10    | 0.8             | Deep     | 11          |
| Guervilly et al | 2017 | 24      | English  | Berlin   | 154       | NR               | 9     | 0.88            | Deep     | 9           |
| Lyu et al       | 2014 | 96      | Chinese  | Berlin   | 142       | 56               | 10    | NR              | Deep     | NR          |
| Moss et al      | 2019 | 1006    | English  | Berlin   | 98.5      | 77.85            | 12    | 0.75            | Light    | 12.55       |
| Papazian et al  | 2010 | 339     | Chines   | AECC     | 110       | 55.5             | 14    | 0.78            | Deep     | 9.2         |
| Rao et al       | 2016 | 41      | English  | Berlin   | 170       | NR               | 8     | 0.56            | Light    | 7           |

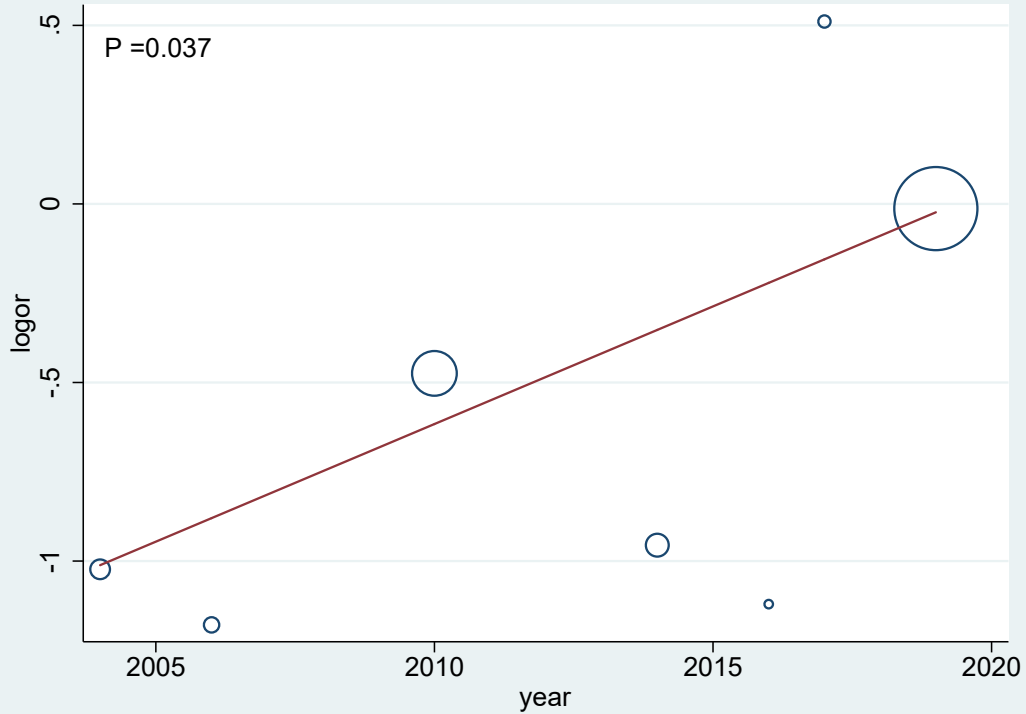

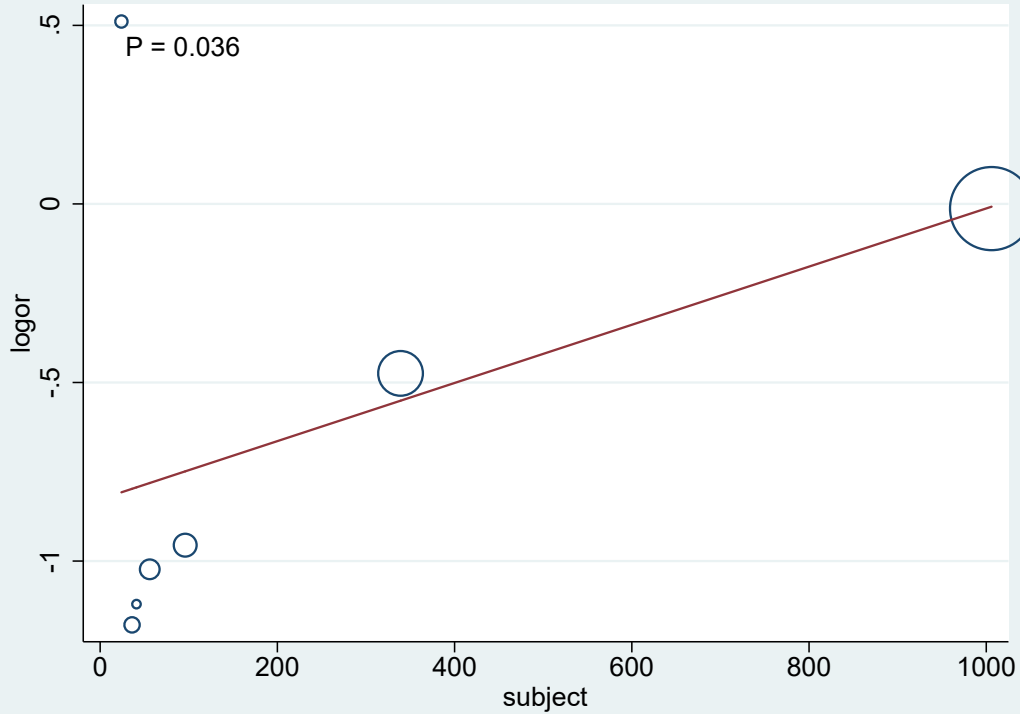

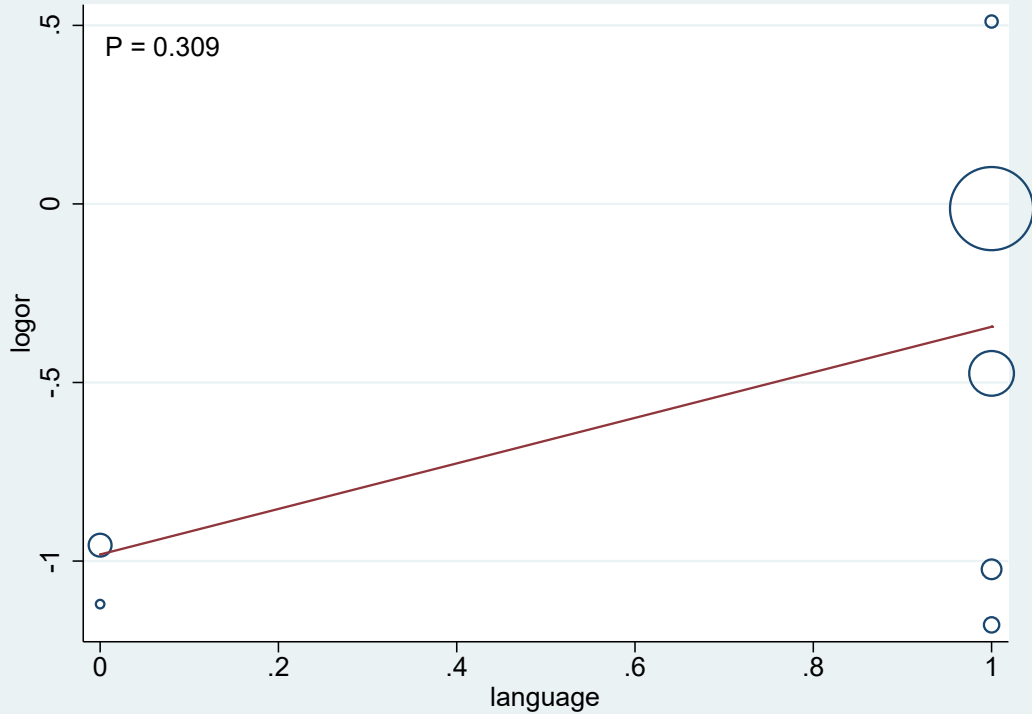

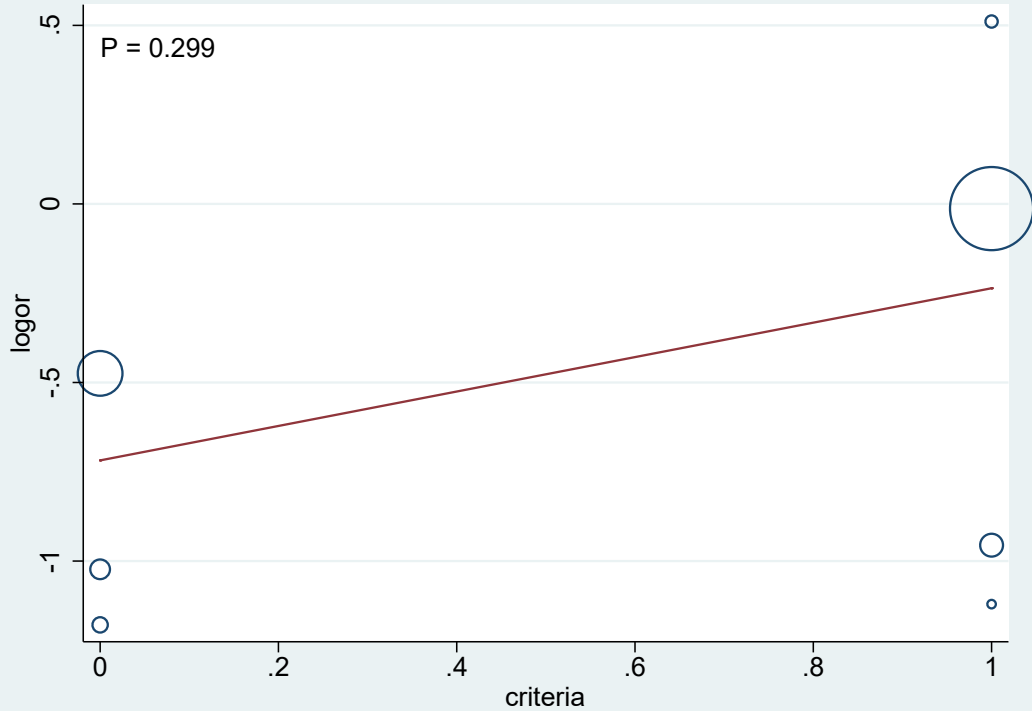

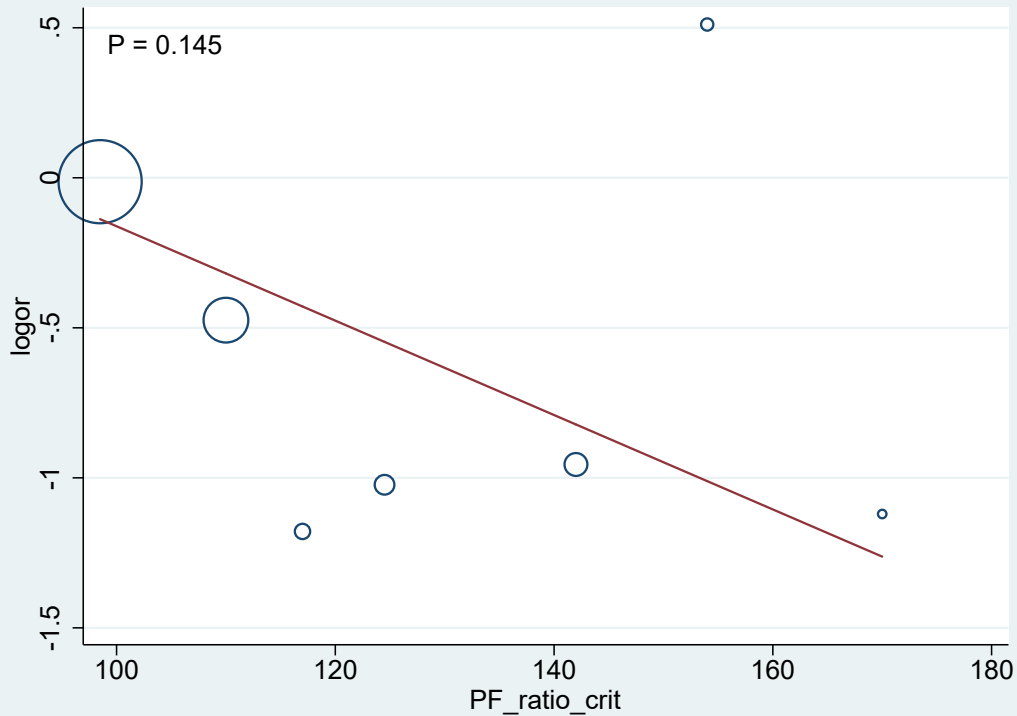

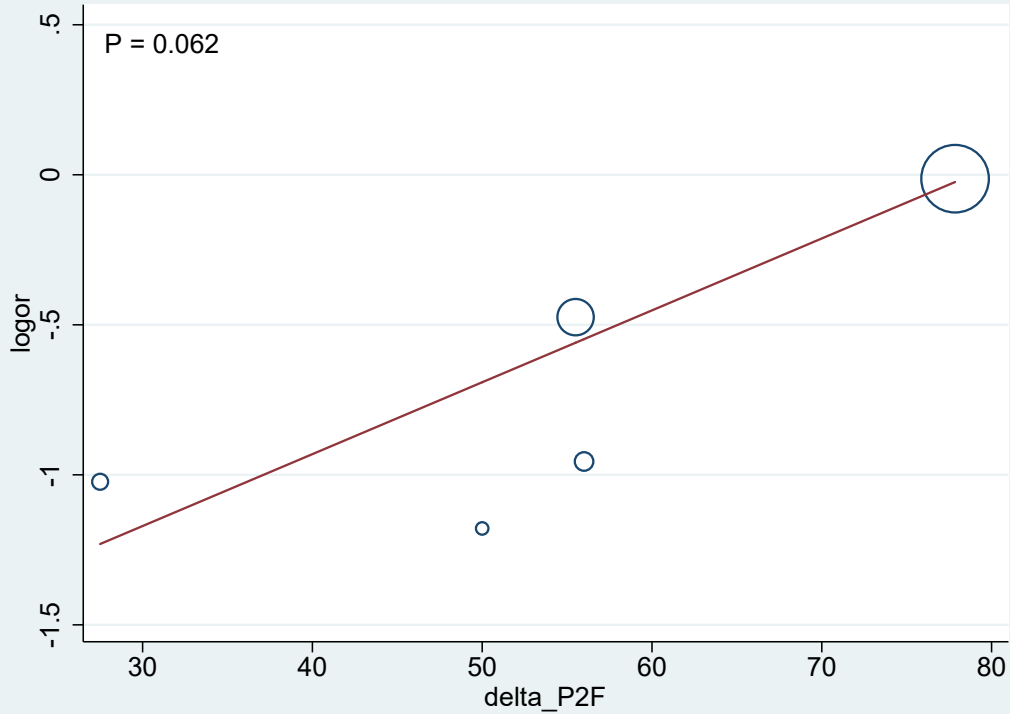



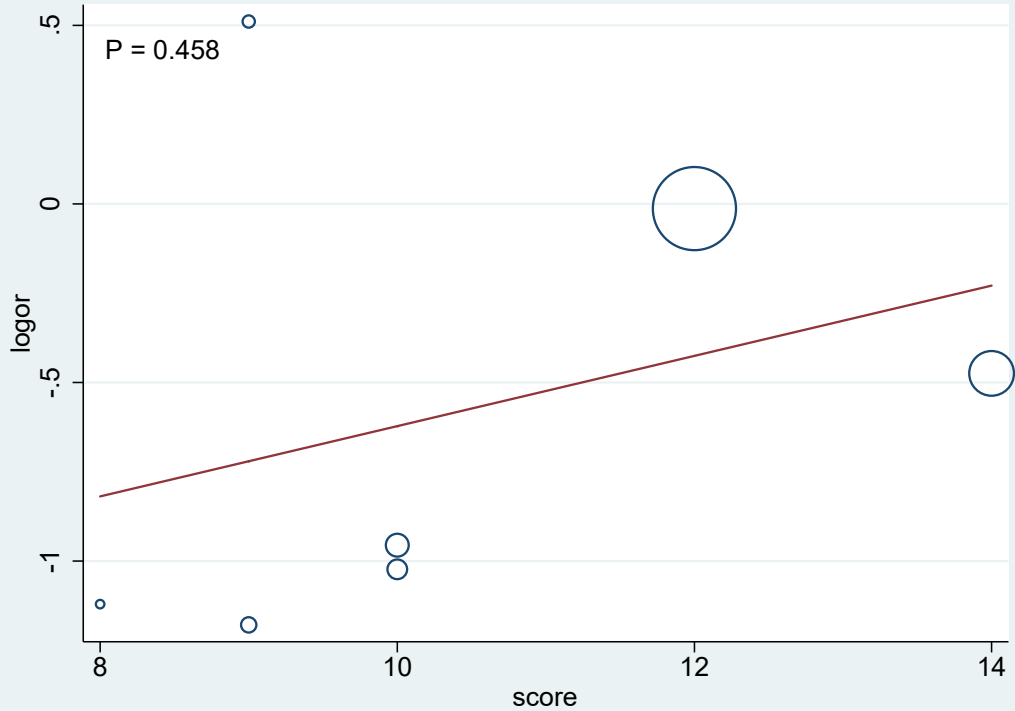

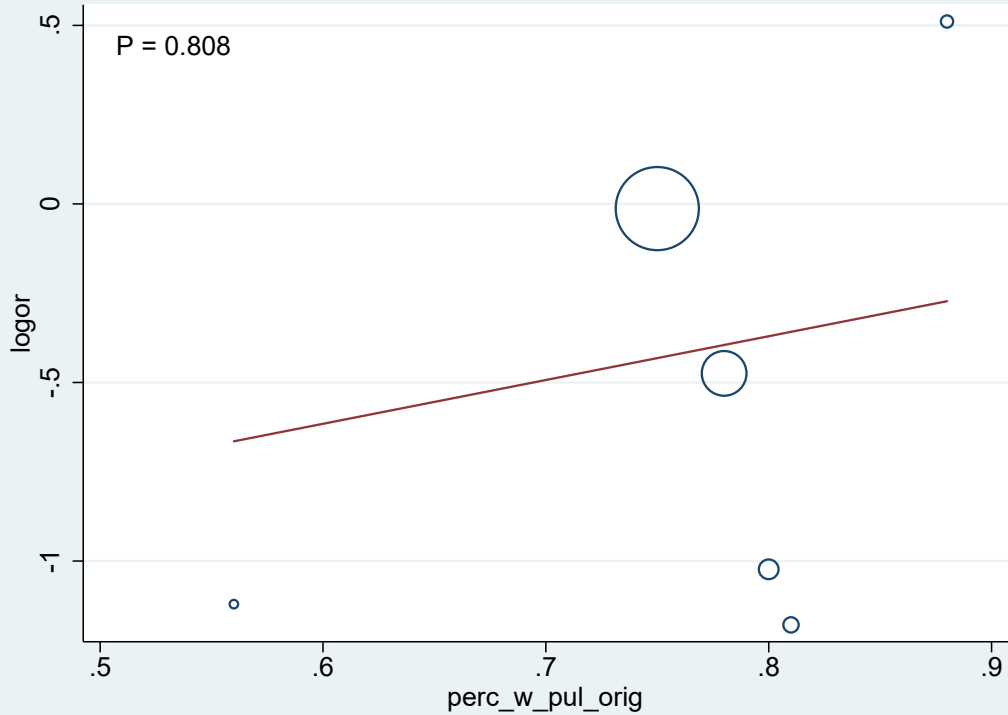

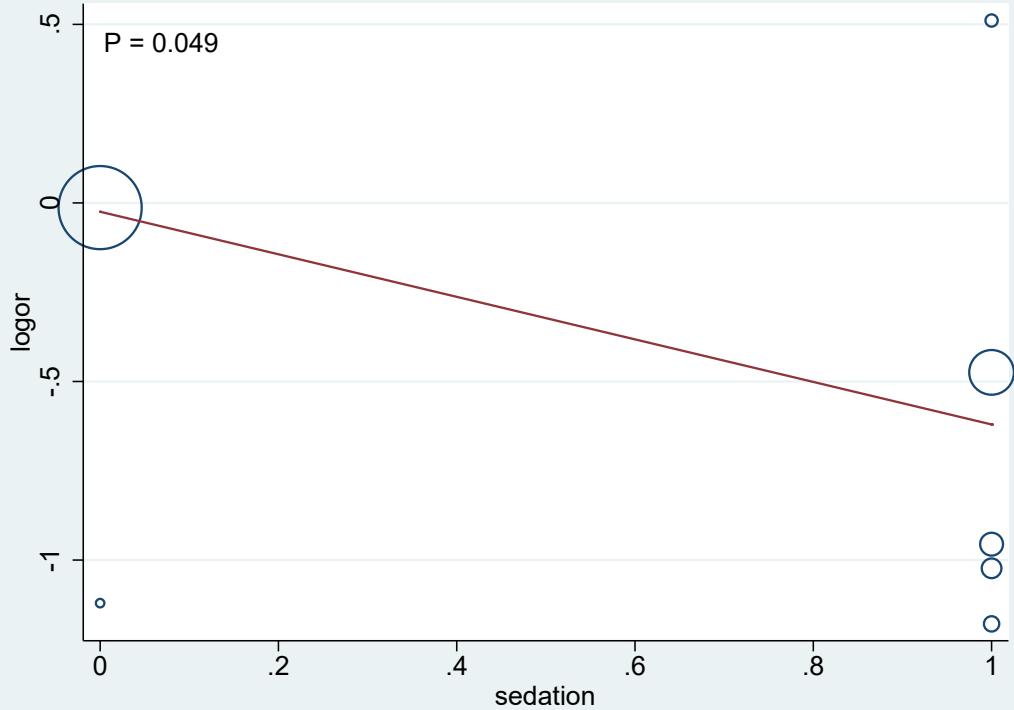

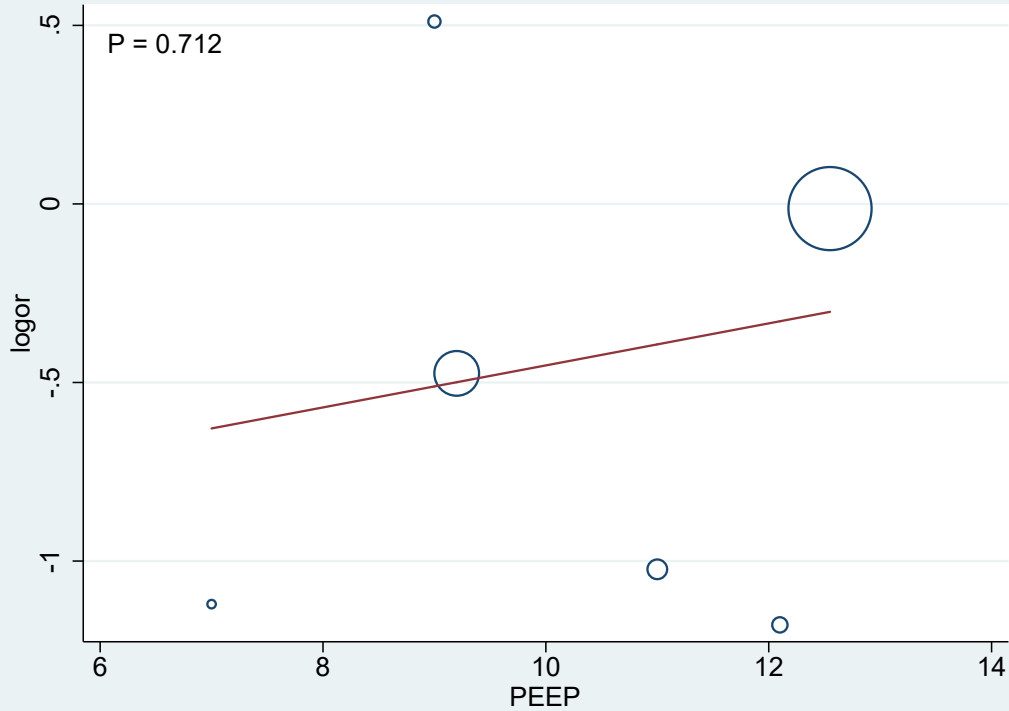

Supplement: MOESM8 [file 17715902]
