# Supplementary material for: Validation of neuromuscular blocking agent use in acute respiratory distress syndrome: a meta-analysis of randomized trials
Source: Springer Nature journal article supplement (doi:10.1186/s13054-020-2765-2), 2020-02-17

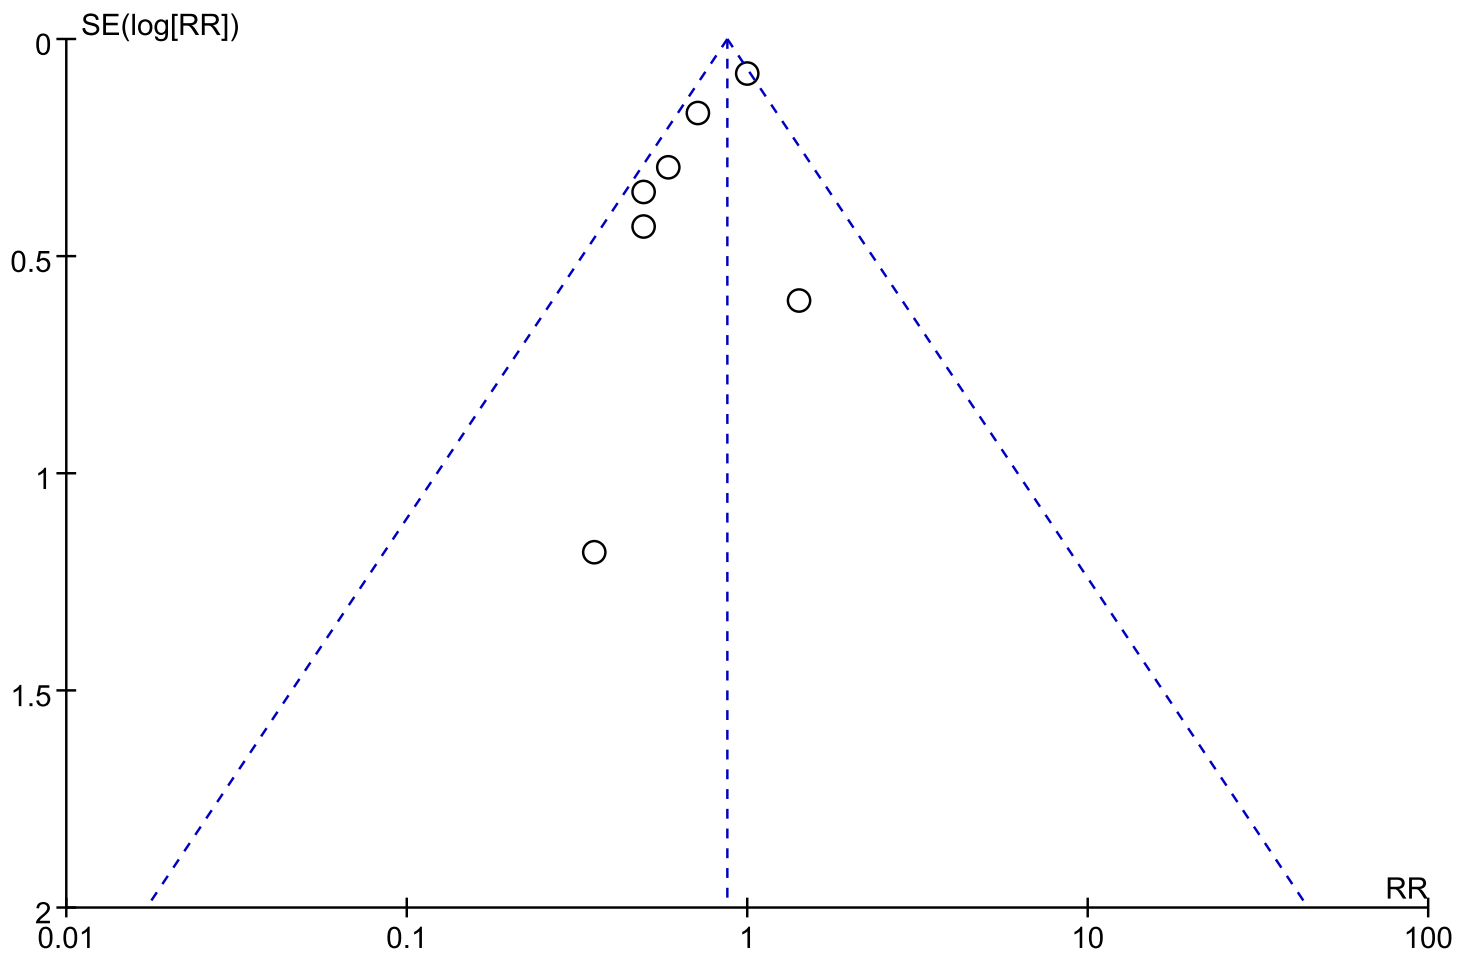

Supplement: MOESM7 [file 17715902]
